# Supplementary material for: Ancistrocladus tectorius Extract Inhibits Obesity by Promoting Thermogenesis and Mitochondrial Dynamics in High-Fat Diet-Fed Mice
Source: MDPI journal article supplement (doi:10.3390/ijms25073743), 2024-03-27
Supplement: s1 [file s1]

## Supplementary file

### *Ancistrocladus tectorius* Extract Inhibits Obesity by Promoting Thermogenesis and Mitochondrial Dynamics in High-Fat Diet-Fed Mice

Minju Kim <sup>1,2</sup>, Jin Hyub Paik <sup>3</sup>, Hwa Lee <sup>1</sup>, Min Ji Kim <sup>1</sup>, Sang Mi Eum <sup>3</sup>, Soo Yong Kim <sup>3</sup>, Sangho Choi <sup>3</sup>, Ho-Yong Park <sup>1</sup>, Hye Gwang Jeong <sup>2,\*</sup> and Tae-Sook Jeong <sup>1,\*</sup>

<sup>1</sup> Microbiome Convergence Research Center, Korea Research Institute of Bioscience and Biotechnology (KRIBB), Daejeon 34141, Republic of Korea; qozus0@kribb.re.kr (M.K.); leehua@kribb.re.kr (H.L.); kam4256@naver.com (M.J.K.); hypark@kribb.re.kr (H.-Y.P.)

<sup>2</sup> College of Pharmacy, Chungnam National University, Daejeon 34134, Republic of Korea

<sup>3</sup> International Biological Material Research Center, KRIBB, Daejeon 34141, Republic of Korea; jpaik@kribb.re.kr (J.H.P.); eomsm@kribb.re.kr (S.M.E.); soodole@kribb.re.kr (S.Y.K.); decoy0@kribb.re.kr (S.C.)

\* Correspondence: hgjeong@cnu.ac.kr (H.G.J.); tsjeong@kribb.re.kr (T.-S.J.)

#### 1. High-performance liquid chromatography (HPLC) analysis of AT 70% ethanol extract (AT extract) and its butanol (BuOH) fraction (Figure S1)

The AT extract and its BuOH fraction were analyzed using an HPLC system equipped with a diode-array detector system (Shimadzu Corporation, Tokyo, Japan) and a Cosmosil 5C18 column (4.6 mm × 150 mm). The injection volume was 10 µL (10 mg/mL), and the mobile phase was consisted of 0.1% acetic acid in water (solvent A) and acetonitrile (solvent B). The linear gradient elution program was set to 5% B for 0–5 min, 5–20% B for 5–15 min, 20–30% B for 15–27 min, 30–80% B for 27–35 min, and 80–100% B for 35–40 min, 100% B for 40–45 min, and 100–5% B for 45–50 min. The flow rate was 1.0 mL/min, and the absorbance of the HPLC profile was 335 nm.

As a result of analysis by HPLC-MS/MS (Tables S1 and Figures S2,S3), compound **1** was predicted to be ancistrocladinium A, a naphthylisoquinoline alkaloids produced from *Ancistrocladus tectorius* [1,2].

The peak areas of compound **1** in AT 70% ethanol extract and its BuOH fraction were 1,868,790 ± 28,096 and 11,083,858 ± 184,849, respectively. The peak area of compound **1** in the BuOH fraction was 5.9 times higher than that in the AT 70% ethanol extract.

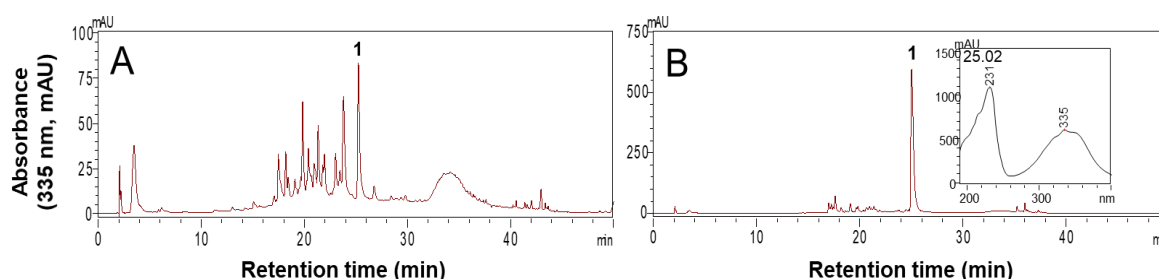

**Figure S1.** High-performance liquid chromatography (HPLC) profiles of the AT 70% ethanol extract and its BuOH fraction. HPLC chromatograms of (A) AT 70% ethanol extract (10 mg/mL) and (B) BuOH Fr. of AT 70% ethanol extract (10 mg/mL) were detected at 335 nm.

## 2. HPLC-MS/MS Analysis of AT Extract (Tables S1 and Figures S2-S4)

### 2.1. Materials and Method (Tabels S1)

#### [1] Materials

|    |         |                       |
|----|---------|-----------------------|
| 1. | Solvent | DW, ACN (B&J)         |
| 2. | Reagent | Formic acid (Aldrich) |

#### [2] Instrument Condition

##### ① LC Method

|    |                   |                                    |
|----|-------------------|------------------------------------|
| 1. | Chromatography    | Accelar UHPLC                      |
| 2. | Mass spectrometry | LTQ-Orbitrap XL                    |
| 3. | Column            | Acquity UPLC® BEH C18, 1.7um       |
| 4. | Solvent           | A: DW(0.1% FOA), B: ACN((0.1% FOA) |
| 5. | Flow rate         | 400 ul/min                         |
| 6. | Injection         | 4 µL                               |

##### ② MS Method

|    |                    |                                          |
|----|--------------------|------------------------------------------|
| 1. | Detection ion mode | Positive([M+H] <sup>+</sup> )            |
| 2. | Scan range         | PDA:200~600 nm; MS : <i>m/z</i> 150~1500 |
| 3. | Spray voltage      | 3.5 kV                                   |
| 4. | Capillary voltage  | 20V                                      |
| 5. | Capillary Temp.    | 350 °C                                   |
| 6. | Software           | Xcalibur                                 |

### 2.2. Results

#### [1] PDA & MS chromatogram (AT extract) (Figures S2)

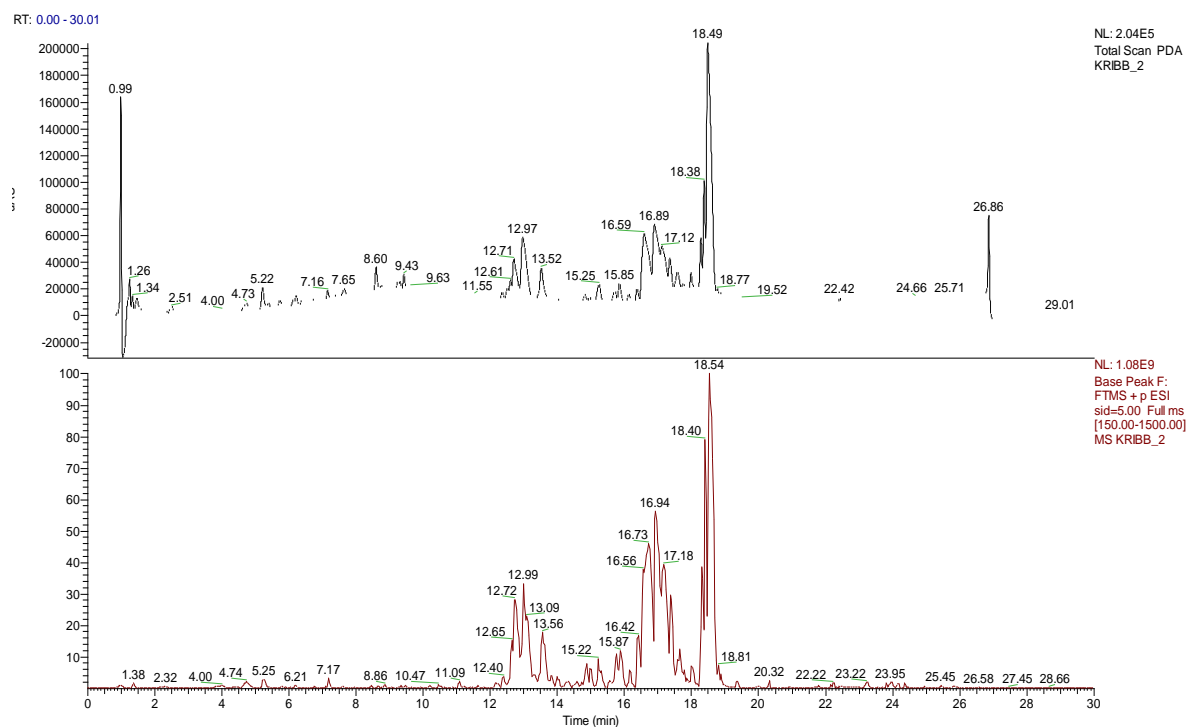

## [2] PDA (AT extract, RT: 18.49) (Figures S3)

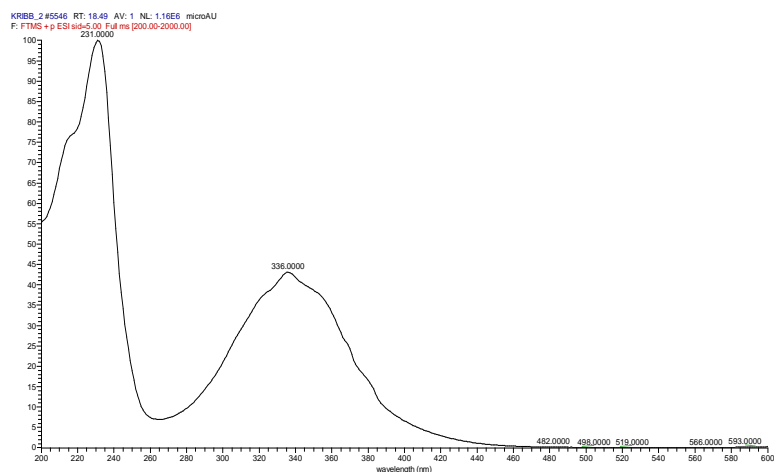

## [3] MS chromatogram (AT extract, RT: 18.54) (Figures S4)

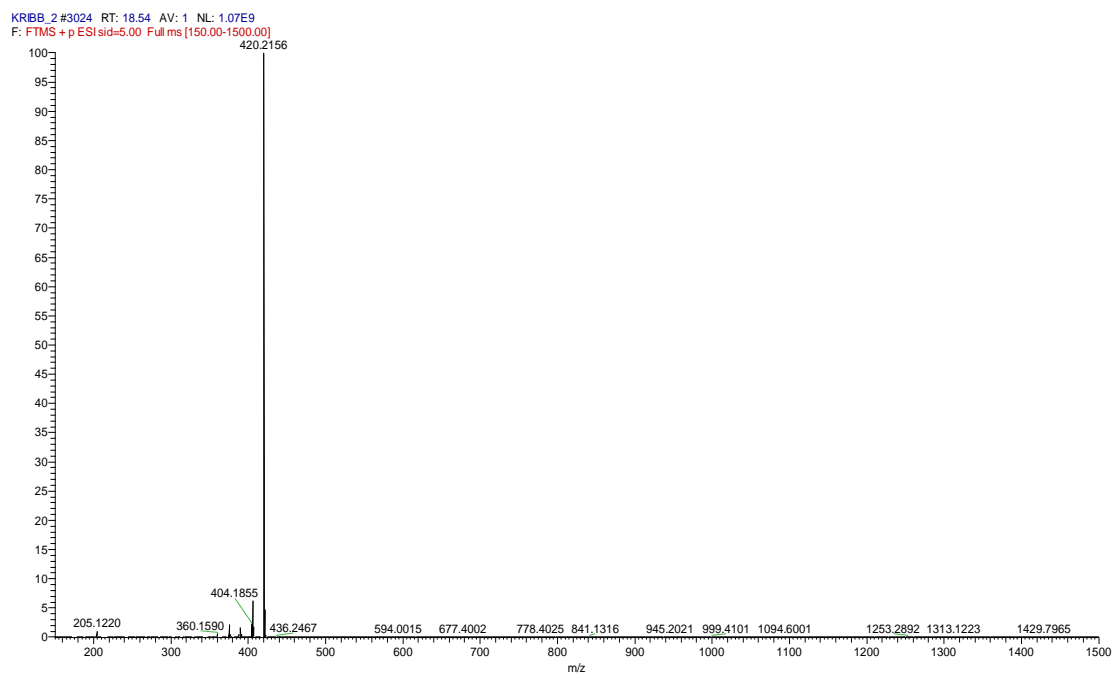

### Elemental composition search on mass 420.22

m/z= 415.22-425.22

| m/z      | Theo. Mass | Delta (ppm) | RDB equiv. | Composition                                                    |
|----------|------------|-------------|------------|----------------------------------------------------------------|
| 420.2156 | 420.2156   | 0.11        | 13.0       | C <sub>24</sub> H <sub>28</sub> O <sub>3</sub> N <sub>4</sub>  |
|          | 420.2161   | -1.09       | 0.5        | C <sub>10</sub> H <sub>30</sub> O <sub>9</sub> N <sub>9</sub>  |
|          | 420.2169   | -3.08       | 12.5       | C <sub>26</sub> H <sub>30</sub> O <sub>4</sub> N               |
|          | 420.2143   | 3.30        | 8.0        | C <sub>23</sub> H <sub>32</sub> O <sub>7</sub>                 |
|          | 420.2142   | 3.31        | 13.5       | C <sub>22</sub> H <sub>26</sub> O <sub>2</sub> N <sub>7</sub>  |
|          | 420.2174   | -4.29       | 0.0        | C <sub>12</sub> H <sub>32</sub> O <sub>10</sub> N <sub>6</sub> |

[4] Reported information of expected structure (**ancistrocladinium A**)

<https://pubchem.ncbi.nlm.nih.gov/compound/15984091>.

((3S)-2-(4,5-dimethoxy-7-methylnaphthalen-1-yl)-6,8-dimethoxy-1,3-dimethyl-3,4-dihydroisoquinolin-2-ium)

## ancistrocladinium A

|                   |                                                                                                                                                                               |                                                                                    |
|-------------------|-------------------------------------------------------------------------------------------------------------------------------------------------------------------------------|------------------------------------------------------------------------------------|
| PubChem CID       | 15984091                                                                                                                                                                      | 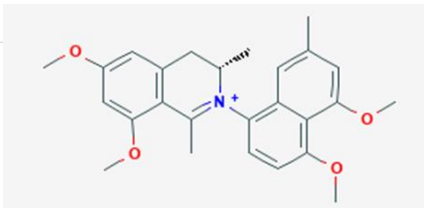 |
| Structure         | <div></div> |                                                                                    |
| Molecular Formula | $C_{26}H_{30}NO_4^+$                                                                                                                                                          |                                                                                    |
| Synonyms          | ancistrocladinium A<br>SCHEMBL5021939<br>ChEMBL1182215<br>J3.576.241H<br>J3.576.243D<br><div>View More...</div>                                                               |                                                                                    |
| Molecular Weight  | 420.5 g/mol<br><i>Computed by PubChem 2.1 (PubChem release 2021.05.07)</i>                                                                                                    |                                                                                    |

### 3.1 Computed Properties

| Property Name                | Property Value     |
|------------------------------|--------------------|
| Molecular Weight             | 420.5 g/mol        |
| XLogP3-AA                    | 5.1                |
| Hydrogen Bond Donor Count    | 0                  |
| Hydrogen Bond Acceptor Count | 4                  |
| Rotatable Bond Count         | 5                  |
| Exact Mass                   | 420.21748344 g/mol |
| Monoisotopic Mass            | 420.21748344 g/mol |

**Ancistrocladinium A [(M)-5].** The isolated compound gave pale yellow crystals in a purity of >96% determined by HPLC: mp  $\geq 230$  °C (dec);  $[\alpha]_D^{20} -6$  ( $c = 0.05$ , MeOH); IR (NaCl)  $\nu_{\max}$  2955, 2925, 2848, 1682, 1609, 1585, 1458, 1438, 1417, 1312, 1278, 1259, 1204, 1176, 1130, 1040, 836, 801  $\text{cm}^{-1}$ ; UV-vis (MeOH)  $\lambda_{\max}$  335 (log  $\epsilon$  1.65), 225 (log  $\epsilon$  2.69), 214 (log  $\epsilon$  2.73) nm; CD (MeOH)  $\Delta\epsilon_{311} -4.4$ ,  $\Delta\epsilon_{238} +2.3$ ,  $\Delta\epsilon_{230} -3.5$ ,  $\Delta\epsilon_{214} +6.4$ ;  $^1\text{H}$  NMR (400 MHz,  $\text{CD}_3\text{OD}$ )  $\delta$  1.30 (d,  $^3J = 7.1$  Hz, 3 H,  $\text{CH}_3$ -3), 2.50 (s, 3 H,  $\text{CH}_3$ -2'), 2.52 (s, 3 H,  $\text{CH}_3$ -1), 3.13 (dd,  $^2J = 17.4$  Hz,  $^3J = 2.5$  Hz, 1 H,  $\text{H}_{\text{eq}}-4$ ), 3.83 (dd,  $^2J = 17.4$  Hz,  $^3J = 6.2$  Hz, 1 H,  $\text{H}_{\text{ax}}-4$ ), 3.97 (s, 3 H,  $\text{OCH}_3$ -4'), 4.01 (s, 3 H,  $\text{OCH}_3$ -5'), 4.03 (s, 3 H,  $\text{OCH}_3$ -6), 4.04 (s, 3 H,  $\text{OCH}_3$ -8), 4.25 (m, 1 H, H-3), 6.74 (s, 1 H, H-7), 6.77 (s, 1 H, H-5), 6.97 (d,  $^3J = 8.5$  Hz, 1 H, H-6'), 6.98 (s, 1 H, H-3'), 7.08 (s, 1 H, H-1'), 7.46 (d,  $^3J = 8.5$  Hz, 1 H, H-7') ppm;  $^{13}\text{C}$  NMR (100 MHz,  $\text{CD}_3\text{OD}$ )  $\delta$  17.2 ( $\text{CH}_3$ -3), 23.9 ( $\text{CH}_3$ -2'), 26.5 ( $\text{CH}_3$ -1), 36.7 (C-4), 58.6 ( $\text{OCH}_3$ -5'), 58.9 ( $\text{OCH}_3$ -4'), 58.8 ( $\text{OCH}_3$ -6), 58.9 ( $\text{OCH}_3$ -8), 61.3 (C-3), 100.7 (C-7), 106.6 (C-6'), 111.1 (C-5), 112.9 (C-3'), 113.8 (C-9), 114.8 (C-1'), 119.7 (C-8'), 128.9 (C-7'), 131.6 (C-10'), 133.8 (C-9'), 143.7 (C-2'), 143.9 (C-10), 161.5 (C-4'), 162.7 (C-5'), 168.1 (C-8), 172.4 (C-6), 179.6 (C-1) ppm; EIMS  $m/z$  (%) = 420.2 (12.3)  $[\text{M}^+]$ , 419.2 (27.9)  $[\text{M} - \text{H}^+]$ , 404.1 (100)  $[\text{M} - \text{CH}_4^+]$ ; HRMS (ESI) calcd for  $\text{C}_{26}\text{H}_{30}\text{NO}_4^+$  420.21748; found 420.21750.

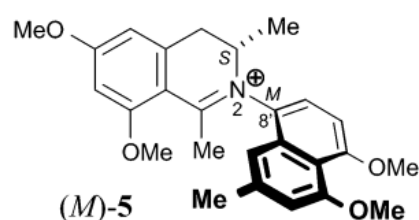

## References

12. Ruangrunsi, N.; Wongpanich, V.; Tantivatana, P.; Cowe, H.J.; Cox, P.J.; Funayama, S.; Cordell, G.A. Traditional medicinal plants of Thailand, V. Ancistrocladine, a new naphthalene-isoquinoline alkaloid from *Ancistrocladus tectorius*. *J. Nat. Prod.* **1985**, *48*, 529–535.
16. Chen, Z.; Wang, B.; Qin, K.; Zhang, B.; Su, Q.; Lin, Q. Isolation and identification of alkaloids from *Ancistrocladus tectorius*. *Acta Pharm. Sin.* **1981**, *16*, 519–523.
20. Bringmann, G.; Kajahn, I.; Matthias Reichert, M.; E. H. Pedersen, S.E.H.; Faber, H.H.; Gulder, T.; Brun, R.; Christensen, S.B.; Ponte-Sucre, A.; Moll, H.; Heubl, G.; Virima Mudogo, M. Ancistrocladinium A and B, the First N,C-Coupled Naphthylidihydroisoquinoline Alkaloids, from a Congolese *Ancistrocladus* Species. *J. Org. Chem.* **2006**, *71*, 9348–9356.

## 3. Effect of AT 70% EtOH extract on body weight in HFD-fed mice

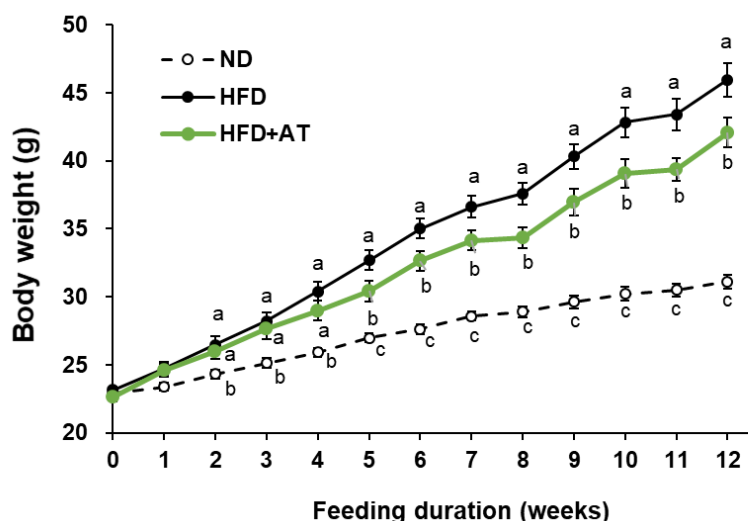

**Figure S5.** Effects of AT extract supplementation on change of body-weight in HFD-fed mice. Data are expressed as means  $\pm$  SE. Different letters (a, b, c) within a variable are significantly different at  $P < 0.05$ .

4. Primer sequences used in this article are described in Table S2.

Table S2. Primers used for mRNA quantification

| Gene name      | Forward primer            | Reverse primer           |
|----------------|---------------------------|--------------------------|
| <i>aP2</i>     | TTTCTCACCTGGAAGACAGC      | TGATGCTCTTCACCTTCCTG     |
| <i>Adrb1</i>   | TCGGTAGATGTGCTGTGTGTGA    | AGCAAACCTCTGGTAGCGAAAGG  |
| <i>Adrb2</i>   | CCTTACCTCCTTTTGCCTATCC    | AGTCTCCTCGGTGTAACAATCGA  |
| <i>Cidea</i>   | TGGAAAAGGGACAGAAATGGA     | TCCCGATTTCCTTGGTTGCTT    |
| <i>Dnm1</i>    | GAGCCAATCCATCTCAAGGTTT    | TTCCCGGTAAATCCACAAGTG    |
| <i>Dnm2</i>    | CATCCGTGACCTTATGCCAAA     | AATACAGGTAAGCCAGCAGCTCAT |
| <i>Fas</i>     | TGTGAGTGGTTCAGAGGCAT      | TTCTGTAGTGCCAGCAAGCT     |
| <i>Gapdh</i>   | ACATCATCCCTGCATCCACT      | AGATCCACGACGGACACATT     |
| <i>Mff</i>     | CGTGGCATTGTCGCTTATC       | AGGTCTGCGGTTTTCATCCA     |
| <i>Mlxip1</i>  | CAGATGCGGGACATGTTTGA      | AATAAAGGTCGGATGAGGATGCT  |
| <i>Mfn1</i>    | TCAAACTGATGAACACGGAGAA    | GAATGAAGATGTTGGGCTTGGA   |
| <i>Mfn2</i>    | CGAGGCTCTGGATTCACTTCA     | CCAACCAGCCAGCTTTATTCC    |
| <i>Opa1</i>    | CCTTTGTCGCAGAGGTTTTTATTAC | AACAGGACCACGTCATTGCA     |
| <i>Pgc1a</i>   | GTGCAGCCAAGACTCTGTAT      | GGTCGCTACACCACTTCAAT     |
| <i>PPARg</i>   | TGGGAGATTCTCCTGTTGAC      | AGGTGGAGATGCAGGTTCTA     |
| <i>Prdm16</i>  | GCGCTTCGAATGTGAAAAGT      | TTGGAGAACTGCGTGTAGGACTT  |
| <i>Srebfl</i>  | GAGCGAGCGTTGAACTGTAT      | ATGCTGGAGCTGACAGAGAA     |
| <i>Srebfl2</i> | TCCTCCATCAACGACAAAATCA    | ACTTGTGCATCTTGGCATCTGT   |
| <i>Ucp1</i>    | CCAGGCTTCCAGTACCATTA      | GCCACACCTCCAGTCATTAA     |
